Full title: Decreased integrity of exercise-induced plasma cell free nuclear DNA  
– negative association with the increased oxidants production by circulating  
phagocytes

Short title: Exhaustive exercise and integrity of circulating cel free DNA and  
blood chemiluminescence

Robert Stawski <sup>1</sup>, Konrad Walczak <sup>2</sup>, Ewelina Perdas <sup>3</sup>, Anna Włodarczyk <sup>4</sup>, Agata Sarniak <sup>5</sup>,  
Piotr Kosielski <sup>6</sup>, Pawel Meissner <sup>6</sup>, Tomasz Budlewski <sup>7</sup>, Gianluca Padula <sup>6</sup>, Dariusz Nowak  
<sup>1\*</sup>.

1. Department of Clinical Physiology, Medical University of Lodz, Lodz, Poland

2. Department of Internal Medicine and Nephrodiabetology, Medical University of Lodz,  
Lodz, Poland

3. Department of Cardiovascular Physiology, Faculty of Medicine, Medical University of  
Lodz, Lodz, Poland

4. Department of Sleep Medicine and Metabolic Disorders, Medical University of Lodz, Lodz,  
Poland

5. Department of General Physiology, Medical University of Lodz, Lodz, Poland

6. Academic Laboratory of Movement and Human Physical Performance, Medical University  
of Lodz, Lodz, Poland

7. Department of Internal Medicine, University Hospital name of the Military Medical  
Academy—Central Hospital Veterans of Lodz, Lodz, Poland

\* Corresponding author: E-mail: [dariusz.nowak@umed.lodz.pl](mailto:dariusz.nowak@umed.lodz.pl)

# Abstract

## Objective

Strenuous exercise increases circulating cell free DNA (cf DNA) and stimulates blood phagocytes to generate more reactive oxygen species (ROS) which may induce DNA strand breaks. We tested whether: (A) elevated cf DNA in response to three repeated bouts of exhaustive exercise has decreased integrity; (B) each bout of exercise increases luminol enhanced whole blood chemiluminescence (LBCL) as a measure of ROS production by polymorphonuclear leukocytes; (C) there is an association between integrity of cf DNA and LBCL.

## Methods

Eleven average-trained men performed three treadmill exercise tests to exhaustion at speed corresponding to 70% of their individual  $VO_{2max}$  separated by 72 hours of resting. Pre- and post-exercise concentrations and integrity of cf nuclear and mitochondrial DNA (cf n-DNA, cf mt-DNA) were determined with real-time PCR along with measurement of resting and fMLP-stimulated LBCL.

## Results

Each bout increased concentrations of cf n-DNA by more than 10-times which was accompanied by about 2-times elevated post-exercise rLBCL and fMLP-LBCL ( $p<0.05$ ). Post-exercise cf n-DNA integrity (integrity index,  $I_{206/78}$ ) decreased after the first ( $0.59\pm0.19$  vs.  $0.48\pm0.18$ ,  $p<0.05$ ) and second ( $0.53\pm0.14$  vs.  $0.44\pm0.17$ ,  $p<0.05$ ) bout of exercise. There were negative correlations between  $I_{206/78}$  and rLBCL ( $q=-0.37$ ,  $p<0.05$ ) and  $I_{206/78}$  and fMLP-LBCL ( $q=-0.40$ ,  $p<0.05$ ) – analysis of pooled pre- and post-exercise data ( $n=66$ ). Although cf-mt DNA rose by about 2-times ( $p<0.05$ ) after the second and third bout, its integrity ( $I_{218/97}$ ) did not alter in response to exercise.

## Conclusions

Repeated bouts of exhaustive exercise caused increase in cf n-DNA with decreased integrity which correlated with increased ROS production by circulating polymorphonuclear leukocytes. This suggests that oxidants may be involved in the release of cf n-DNA and cf n-DNA strand breaks in response to exhaustive exercise.

## Introduction

There are rising evidences suggesting that besides health promoting effects, exhaustive exercises might have potential adverse effects on immune system [1-2]. Therefore, explanation of this issue is essential for training recommendations or customization of individual training load. Interestingly, bouts of strenuous exercise caused rapid increase in cell free DNA (cf DNA) concentration in plasma, moreover it was suggested to be a promising marker of acute exercise induced-metabolic changes in human body [3]. Furthermore, previous studies based on sex-mismatched hematopoietic stem cell transplantation patients, indicated that exercise-induced cf DNA release, originated primarily from hematopoietic cells or their descendants [4,5]. The common process following exhaustive exercises is leukocyte demargination from the vascular, hepatic, pulmonary or spleen reservoirs in parallel with exercise-induced increase in cardiac output and blood flow. This elevates the white blood cell count, however, it seems to be not the main contributor to the exercise-induced increase in cf DNA because the rise in the latter is many times higher than post-exercise leukocytosis [3]. Therefore, mechanisms responsible for this phenomenon could include at least the elevated number of circulating leukocytes accompanied by the increase in their activity leading to release of variety of biomolecules including DNA [3]. This is in line with the recent observation of increased formation of intravascular neutrophil

extracellular traps (NETs) that could be responsible for the rise in cf DNA in untrained individuals after exhaustive exercise [6].

Respiratory burst of circulating phagocytes (mainly polymorphonuclear leukocytes - PMNs) in combination with phagocytosis and NETs formation is essential for innate immunity [7-8]. However, the increased activity of PMNs- derived reactive oxygen species (ROS) can induce damage to variety of biomolecules including modification of DNA bases and DNA strand breaks with subsequent necrosis or maladaptive apoptosis. Generation of ROS related to activation of circulating PMNs NADPH oxidase complex can be monitored with the luminol enhanced whole blood chemiluminescence (LBCL) technique [9-10]. It was elevated in patients with various inflammatory diseases [11-12], after heart surgery and even in healthy subjects after exhaustive exercise [13-15].

Currently, analysis of cf DNA integrity is commonly used to distinguish its origin, particularly apoptotic from necrotic cause of cell death. Where typical apoptotic process leads to the production of around 180 base pair long DNA fragments, in other pathological circumstances (e.g. cancer, sepsis) the integrity of cf DNA generally shifts into larger fragments, indicating increased contribution of necrosis to their release [16]. Release of cf DNA fragments in response to stressor factor switching on the necrotic or apoptotic processes takes at least a few hours (17). However, exercise-induced increment in circulatory cf DNA was observed just after the first minutes reaching maximum after 25 min of exhaustive treadmill run (18), suggesting that other processes related to activation of blood leukocytes (e.g. NETs formation) can be responsible for the increase in cf DNA after exercise. On the other hand, simultaneous activation of respiratory burst of circulating PMNs and increase in ROS activity can lead to strand breaks of released DNA and thus formation of cf DNA with decreased integrity. cf DNA can be divided in two pools: cell free nuclear DNA (cf n-DNA) and cell free mitochondrial DNA (cf mt-DNA), deriving from nucleus or cytoplasmic

mitochondria's, respectively. Because of lack of nucleosomal structure, cf mt-DNA fragments present different pattern of integrity than cf n-DNA. Unlike to cf n-DNA, the integrity of cf mt-DNA is not directly related to apoptotic or necrotic process [19]. Moreover, mt-DNA seems to be more sensitive to oxidative stress and other genotoxic damages due to the lack of protective proteins and efficient DNA repair mechanism [20]. Therefore, it seems that integrity of cf mt-DNA could be more affected by ROS increase following exhaustive exercise than that of cf n-DNA. To solve this question, we compared the pre- and post-exercise plasma concentrations and integrity of cf n-DNA and cf mt-DNA in relation to ROS production by circulating PMNS (as reflected by the LBCL test) in healthy physically active men subjected to three repeated exhaustive treadmill runs.

## Methods

### Studied population

This study is the extension of the previous one [3] describing the rise of cf n-DNA, cf mt-DNA and selected metabolic and muscle damage markers in response to three repeated bouts of exhaustive exercise, and included eleven apparently healthy, average-trained men (mean age  $34.0 \pm 5.2$  years, mean body mass index  $26.2 \pm 3.1$  kg/m<sup>2</sup>, maximal oxygen consumption  $VO_{2max}$   $49.6 \pm 4.5$  ml/kgxmin). The inclusion criteria were age between 25 and 45 years, a written informed consent before initiating the study procedures. The exclusion criteria included alcohol and illicit drug abuse, current cigarette smoking, any history of infectious or inflammatory diseases, use of any vitamins or food supplements, or any systemic pharmacological treatment within 3 months prior to the study. All subjects agreed to keep their dietary habits constant during the study period and to comply with the instructions related to participation in the study.

## **The study design**

The study design, blood samples collection and processing as well as isolation of cf DNA from plasma were described in details in our previous study [3]. Briefly, the study consisted of 4 visits at the 1<sup>st</sup>, 7<sup>th</sup>, 10<sup>th</sup> and 13<sup>th</sup> day of observation. At the first visit (day 1<sup>st</sup>) 11 average-trained men underwent treadmill VO<sub>2</sub> max test and afterwards, at the three consecutive visits (day 7<sup>th</sup>, 10<sup>th</sup>, 13<sup>th</sup>), participants performed treadmill exercise to volitional exhaustion at speed corresponding to 70% of their personal VO<sub>2</sub> max. Venous blood was collected just before and after each bout of exercise for determination of concentration and integrity of cell free nuclear (cf n-DNA) and mitochondrial DNA (cf mt-DNA), and resting (rLBCL) and n-formyl-methionyl-leucyl-phenylalanine (fMLP) – stimulated LBCL. During the whole study period (13 days) volunteers did not perform any exhaustive exercise besides those related to the study protocol. The study was conducted according to the Declaration of Helsinki. The protocol was reviewed and approved by The Medical University of Lodz Ethics Committee (RNN/95/14/KB), and all volunteers provided a written informed consent.

## **Determination of plasma cell free DNA integrity**

The integrity of circulating cf n-DNA was evaluated by a quantitative real-time PCR (qPCR) targeting the human GAPDH (glyceraldehyde 3-phosphate dehydrogenase) gene (gene ID 2597). The length of the amplicons selected for this assay was 78 and 206 bps, respectively. The ratio of the concentration of the longer amplicon (GAPDH<sub>206</sub>) to the concentration of the shorter one (GAPDH<sub>78</sub>) (ranging from 0 to 1) defined the integrity index 206/78 ( $I_{206/78}$ ), which was used to estimate the fragmentation of cf n-DNA. Higher values of  $I_{206/78}$  (e.g.  $I_{206/78} = 1$ ) indicate that all the cf n-DNA molecules are at least 206 bp in length in the GAPDH gene while lower values show that cf n-DNA contains fragments below 206 bp in the same target gene sequence. Similarly two amplicons, one of 218 bp length (encoding part of

mitochondrial ATPase 6 gene, ID 4508, and mitochondrial ATPase 8 gene, ID 4509) and the second one of 97 bp length (encoding part of mitochondrial ATPase 8 gene) for calculation of cf mt-DNA integrity index 218/97 ( $I_{218/97}$ ) were chosen. The assay was designed in a way that the forward primer and the probe were the same for each pair of amplicons, whereas two different reverse primers were used. Both, GAPDH<sub>78</sub> and MTATP<sub>97</sub> primers and corresponding probes were described and successfully used in previous studies (1,21). However, the primers for longer sequences (GAPDH<sub>206</sub> primer and MTATP<sub>218</sub> primer) were planned using program primer 3 (Table 1). qPCR was carried out in 20  $\mu$ L of total reaction volume containing 6.5  $\mu$ L H<sub>2</sub>O, 10  $\mu$ L TaqMan® Universal PCR Master Mix (Applied Biosystems, Branchburg, New Jersey, USA), 0.25  $\mu$ L of each of the two matched primers (one forward and one reverse primer for longer amplicon or one forward and one reverse primer for shorter amplicon) (Sigma-Aldrich), 1  $\mu$ L of a FAM-labeled MT-ATP 8-probe or 1  $\mu$ L of a MVIC-labeled GAPDH-probe (both probes from Applied Biosystems, Branchburg, New Jersey, USA), and 2  $\mu$ L of TE buffer containing cf DNA isolated from plasma. The final concentrations of primers and probes were 0.6  $\mu$ mol/L and 0.4  $\mu$ mol/L, respectively. Negative control samples received 2  $\mu$ L of TE buffer without cf DNA from plasma. Reaction was done in duplicate and performed using the 7900 HT Real-time PCR System (Applied Biosystems) under the following conditions: an initiation step at 50°C for 2 min, followed by a first denaturation at 95°C for 10 min, then 40 cycles at 95°C for 15 s and annealing at 60°C for 1 min. Serial dilutions of human genomic DNA (Roche) (final concentrations from 0.5 ng/mL to 5000 ng/mL) were used to construct the calibration curve ( $r^2 = 0.9996$ ) for measurement of PCR products.

# **Table 1**

172 The sequences of primers and probes used for determination of integrity index of circulating  
173 cell free nuclear DNA (cf n-DNA) and cell free mitochondrial DNA (cf mt-DNA).  
174

| Primer/probe   | Integrity index of plasma cell free DNA |                                   |
|----------------|-----------------------------------------|-----------------------------------|
|                | Nuclear I <sub>206/78</sub>             | Mitochondrial I <sub>218/97</sub> |
| Forward primer | CCCCACACACATGCACTTACC                   | AATATTAAACACAAACTACC              |
| Reverse primer | ATCAAACCTCAAAGGGCAGGA [206 bp]          | CTAACCTCCTCGGACTCCTG [218 bp]     |
| Reverse primer | CCTAGTCCCAGGGCTTTGATT [78 bp]           | TGGTTCTCAGGGTTTGTTAT [97 bp]      |
| MGB probe      | TAGGAAGGACAGGCAAC-(FAM)                 | CCTCACCAAAGCCCATA-(VIC)           |

175 The forward primer and the probe were the same for each pair of amplicons, whereas the  
176 sequences of reverse primer were different. In brackets the amplicon length.  
177

## 178 **Resting and fMLP-induced luminol enhanced whole blood** 179 **chemiluminescence**

180 The resting (rLBCL) and fMLP-induced LBCL (fMLP-LBCL) were measured according to  
181 the method of Kukovetz et al. [9] with some modifications [10]. Briefly, 30 µL of venous  
182 blood (collected into vacutainer tubes with EDTA) was initially diluted with 1 mL of mixture  
183 solution containing 127.5 µg/mL of luminol [10]. Then 103 µL of diluted blood was added to  
184 797 µL of mixture solution (to obtain a final blood dilution of 300 times), placed in a  
185 multitube luminometer (AutoLumat Plus LB 953, Berthold, Germany) equipped with a  
186 Peltier-cooled detector to ensure high sensitivity, and a low and stable background noise  
187 signal, and incubated for 15 minutes at 37°C in the dark. Then 100 µL of the control solution  
188 (solvent for fMLP) or 100 µL of fMLP solution (final agonist concentration in the sample of  
189 2x10<sup>-5</sup> mol/L) for measurement of rLBCL and fMLP-LBCL was added by automatic  
190 dispensers and the total light emission was automatically measured for 120 seconds.



Individual results were obtained as the mean of triplicate experiments and rLBCL and fMLP-LBCL was expressed in relative light units (RLU) per  $10^4$  phagocytes (PMNs and monocytes) present in the assayed sample [10].

## Other determinations

Plasma levels of cf n-DNA and cf mt-DNA were determined with real time quantitative PCR as previously described [3]. Individual results were obtained as a mean from two separate runs and expressed in ng/mL for cf n-DNA and as genome equivalents (GE)/ml plasma (1 GE = 6.6 pg DNA) for cf mt-DNA [21]. Blood cell count was measured with a Micros Analyzer OT 45 (ABX, Montpellier, France).

## Statistical analysis

Results are expressed as a mean (SD) and median (interquartile range). Analysis of variance (ANOVA) for repeated observations or Friedman's ANOVA was applied for the assessment of changes in variables over time (before and after three consecutive exercise bouts) depending on data distribution which was tested with Shapiro-Wilk's Wtest. In case of statistically significant ANOVA, the post hoc analyses were done with Scheffe's test or post hoc analysis for Friedman's ANOVA (multiple comparisons at 2 different time points). Correlations between variables were determined using Spearman's  $\rho$ . A p value < 0.05 was considered significant.

## Results

All included men successfully completed the study protocol of three repeated exhaustive

treadmill exercises, and changes of selected markers of muscle damage, parameters related to exercise tests as well as the metabolic and cardiovascular responses to exercise have been described elsewhere [3]. Each bout induced the increase ( $p < 0.05$ ) in plasma cf n-DNA: from  $3.4 \pm 1.4$  to  $38.5 \pm 27.5$ , from  $4.1 \pm 3.3$  to  $48.5 \pm 26.2$ , and from  $3.1 \pm 1.6$  to  $53.8 \pm 39.9$  ng/mL after the 1<sup>st</sup>, 2<sup>nd</sup>, and 3<sup>rd</sup> exercise, respectively. However, cf mt-DNA increased significantly by about 2- and 2.4-times only after the 2<sup>nd</sup> (from  $229 \pm 216$  to  $450 \pm 228 \times 10^3$  GE/mL) and 3<sup>rd</sup> (from  $173 \pm 120$  to  $462 \pm 314 \times 10^3$  GE/mL) exhaustive treadmill run [3].

## **Changes of integrity of circulating cell free nuclear and mitochondrial DNA in response to three repeated bouts of exhaustive treadmill exercise**

Pre-exercise integrity of cf n-DNA expressed as  $I_{206/78}$  did not alter significantly over the study period. However, the tendency to gradual decrease in  $I_{206/78}$  was noted e.g.  $I_{206/78} = 0.59 \pm 0.19$  before the 1<sup>st</sup> bout in comparison to  $I_{206/78} = 0.50 \pm 0.22$  before the 3<sup>rd</sup> one (Table 2). Exhaustive exercise resulted in the decrease in cf n-DNA integrity especially after the 1<sup>st</sup> (pre-exercise  $I_{206/78} = 0.59 \pm 0.19$  vs post-exercise  $I_{206/78} = 0.48 \pm 0.18$ ,  $p < 0.05$ ) and the 2<sup>nd</sup> bout (pre-exercise  $I_{206/78} = 0.53 \pm 0.14$  vs post-exercise  $I_{206/78} = 0.44 \pm 0.17$ ,  $p < 0.05$ ). In contrast to cf n-DNA integrity, the pre- and post-exercise-integrity of cf mt-DNA ( $I_{218/97}$ ) was relatively stable over the study period and did not alter in response to exercise (Table 2).

**Table 2.**

Cell free nuclear (cf n-DNA) and mitochondrial (cf mt-DNA) DNA integrity in eleven average-trained men before and after each of three bouts of exhaustive treadmill exercise.

| DNA integrity | 1 <sup>st</sup> bout (day 7) |       | 2 <sup>nd</sup> bout (day 10) |       | 3 <sup>rd</sup> bout (day 13) |       |
|---------------|------------------------------|-------|-------------------------------|-------|-------------------------------|-------|
|               | Before                       | After | Before                        | After | Before                        | After |

|                        |              |              |              |              |              |              |
|------------------------|--------------|--------------|--------------|--------------|--------------|--------------|
| cf n-DNA               | 0.59±0.19    | 0.48±0.18*   | 0.53±0.14    | 0.44±0.17*   | 0.50±0.22    | 0.45±0.17    |
| (I <sub>206/78</sub> ) | (0.57; 0.36) | (0.46; 0.36) | (0.55; 0.13) | (0.46; 0.33) | (0.38; 0.36) | (0.41; 0.22) |
| cf mt-DNA              | 0.54±0.16)   | 0.60±0.26    | 0.63±0.18    | 0.67±0.16    | 0.65±0.18    | 0.66±0.20    |
| (I <sub>218/97</sub> ) | (0.59; 0.28) | (0.69; 0.39) | (0.53; 0.33) | (0.63; 0.30) | (0.67; 0.16) | (0.79; 0.40) |

Eleven average-trained men completed the study composed of four visits at days 1, 7, 10 and 13. After determination of VO<sub>2</sub> max at day 1, three repeated treadmill exercise tests to exhaustion at speed corresponding to 70% of personal VO<sub>2</sub> max were executed at days 7, 10 and 13. Results are expressed as mean ±SD (median; IQR). \* vs corresponding value before the bout, p<0.05.

### **Changes of resting and fMLP-stimulated luminol enhanced whole blood chemiluminescence in response to three repeated bouts of exhaustive treadmill exercise.**

Mean rLBCL increased by about 2.1-, 2.6- and 2.4-times (p<0.05) in response to the 1<sup>st</sup>, 2<sup>nd</sup> and the 3<sup>rd</sup> bout of exhaustive exercise (Table 3). The values of pre-exercise rLBCL were relatively stable over the study period and the same was noted for the post-rLBCL. Similarly, behaved mean fMLP-LBCL: 1.7- , 1.8- and 1.5-fold increase (p<0.05) after each exhaustive treadmill run and no significant changes of pre- and post-exercise values of fMLP-LBCL during 6 days of observation (Table 3). Consequently, the mean ratio of pre-exercise fMLP-LBCL to pre-exercise rLBCL values was similar and ranged from 2.7 at the 1<sup>st</sup> bout to 3.0 at the 3<sup>rd</sup> bout. The mean ratio of post-exercise fMLP-LBCL to post-exercise rLBCL was also stable and reached 2.2, 1.8 and 1.9 after the 1<sup>st</sup>, 2<sup>nd</sup> and 3<sup>rd</sup> bout of exercise, respectively.

**Table 3.**

257 Resting (rLBCL) and fMLP-stimulated luminol enhanced whole blood chemiluminescence  
258 (fMLP-LBCL) in eleven average-trained men before and after each of three bouts of  
259 exhaustive treadmill exercise.

| Blood<br>chemilumi<br>nescence | 1 <sup>st</sup> bout (day 7) |                          | 2 <sup>nd</sup> bout (day 10) |                          | 3 <sup>rd</sup> bout (day 13) |                          |
|--------------------------------|------------------------------|--------------------------|-------------------------------|--------------------------|-------------------------------|--------------------------|
|                                | Before                       | After                    | Before                        | After                    | Before                        | After                    |
| rLBCL                          | 326±269<br>(196; 479)        | 697±302*<br>(786; 431)   | 335±244<br>(280; 551)         | 870±663*<br>(728;1056)   | 319±261<br>(274; 528)         | 765±610*<br>(577; 1125)  |
| fMLP-<br>LBCL                  | 892±435<br>(941; 561)        | 1531±607*<br>(1575;1014) | 909±375<br>(885; 692)         | 1598±737*<br>(1613;1192) | 960±525<br>(802; 746)         | 1470±907*<br>(951; 1442) |

260  
261 Results expressed in relative light units per 10<sup>4</sup> phagocytes present in the assayed sample are  
262 shown as mean ±SD (median; IQR). \* vs corresponding value before the bout, p<0.05. Other  
263 details as for Table 2.

264  
265 **Correlations between integrity of cf n-DNA and whole blood**  
266 **chemiluminescence before and after three repeated bouts of exhaustive**  
267 **exercise**

268 Because we studied a relatively low group of men (n=11), the direct analysis of correlations  
269 between variables obtained during one bout was inconclusive. Therefore, to overcome (at  
270 least partially) this problem, we analyzed correlations between integrity of cf n-DNA (I<sub>206/78</sub>)  
271 and LBCL by using the following datasets from three bouts of exhaustive exercise: (A)-  
272 pooled individual pre-exercise data (n=33); (B)- pooled individual post-exercise data (n=33),  
273 and (C)- pooled pre- and post-exercise data (n=66) (Table 4). There was a negative correlation  
274 of moderate strength between pre-exercise I<sub>206/78</sub> and pre-exercise fMLP-LBCL (q = -0.36,

p<0.05), while correlation between post-exercise  $I_{206/78}$  and post-exercise rLBCL or fMLP-LBCL reached borderline significance (Table 4). However, in the case of analysis of dataset involving pre- and post-exercise data together,  $I_{206/78}$  negatively correlated with rLBCL ( $\rho = -0.37$ ,  $p < 0.05$ ) and fMLP-LBCL ( $\rho = -0.40$ ,  $p < 0.05$ ). The same analyses performed between integrity of cf mt-DNA ( $I_{218/97}$ ) and whole blood chemiluminescence (rLBCL, fMLP-LBCL) revealed no significant correlations ( $\rho$  ranged between 0.11 and 0.38).

**Table 4**

Spearman's ( $\rho$ ) correlations between integrity of cell free nuclear DNA expressed as  $I_{206/78}$  and resting and fMLP-induced luminol enhanced whole blood chemiluminescence in eleven average trained healthy men before and after three repeated bouts of exhaustive treadmill exercise.

| Correlated variables                      | rLBCL  | fMLP-LBCL | Explanation                                                           |
|-------------------------------------------|--------|-----------|-----------------------------------------------------------------------|
| Integrity of cf n-DNA<br>( $I_{206/78}$ ) | -0.29  | -0.36*    | Pooled individual pre-exercise data from three bouts (n=33)           |
| Integrity of cf n-DNA<br>( $I_{206/78}$ ) | -0.31# | -0.32†    | Pooled individual post-exercise data from three bouts (n=33)          |
| Integrity of cf n-DNA<br>( $I_{206/78}$ ) | -0.37* | -0.40*    | Pooled individual pre- and post-exercise data from three bouts (n=66) |

cf n-DNA – cell free nuclear DNA, rLBCL – resting luminol enhanced whole blood chemiluminescence, fMLP-LBCL – n-formyl-methionyl-leucyl-phenylalanine – stimulated luminol enhanced whole blood chemiluminescence. Other details as for table 2. \* -  $p < 0.05$ , # - borderline significance –  $p = 0.08$ , † - borderline significance –  $p = 0.06$ .

292

## 293 **Discussion**

294 It is generally believed that regular physical activity has important health promoting effect.  
 295 However, long term, repeated exhaustive exercises can evoke pathological reactions leading  
 296 to the development of overtraining syndrome [22, 23, 24]. High intensity exercise related to  
 297 various sports disciplines [25, 26] was reported to cause fast, transient increases in circulating  
 298 cf DNA reaching concentrations comparable to those observed in trauma or sepsis [27, 28].  
 299 Some studies suggest that elevated plasma cf DNA levels may be associated with the  
 300 increased risk of occurrence of overtraining syndrome in athletes [29, 30]. Recently, we found  
 301 that three repeated bouts of exhaustive treadmill exercise induced increase in cf n-DNA and cf  
 302 mt-DNA in average trained healthy men without development of tolerance [3]. In the present  
 303 study (which is the continuation of the afore-mentioned one), we found that the increase in cf  
 304 n-DNA in response to each of three repeated bouts of exhaustive treadmill exercise is  
 305 accompanied by the decrease in cf n-DNA integrity. In parallel to this phenomenon, each bout  
 306 of exercise caused significant increase in rLBCL and fMLP-LBCL and that reflects increased  
 307 post-exercise ROS production by circulating phagocytes, namely PMNs. Moreover, analysis  
 308 of pooled data from all bouts revealed a few significant negative correlations between  
 309 integrity index of cf n-DNA and LBCL. These considerations suggest the involvement of  
 310 ROS generated from circulating phagocytes in fragmentation of post-exercise cf n-DNA.  
 311 Although, cf mt-DNA raised in response to the 2<sup>nd</sup> and 3<sup>rd</sup> bout of exercise, very surprisingly,  
 312 no changes of the integrity index of cf mt-DNA were noted over the study period.

313

314 **Effect of three repeated bouts of exhaustive treadmill exercise on luminol**  
 315 **enhanced whole blood chemiluminescence**

Each bout of exercise increased mean rLBCL and fMLP-LBCL in healthy men. Moreover, individual results (data not shown) revealed substantial increase in post-exercise rLBCL and fMLP-LBCL in each volunteer at any occasion. These observations indicate that exhaustive run increased basic generation of ROS by circulating PMNs and primed these cells for increased ROS production after stimulation with fMLP. Our results are consistent with the previous studies showing increased zymosan-induced luminol enhanced chemiluminescence of neutrophils isolated from blood collected after intensive aerobic exercise in healthy men [31, 32, 33, 34]. Moreover, neutrophils of subjects who completed 100 km-marathon run revealed increased ROS production as reflected by the afore-mentioned method [35]. On the other hand, other studies did not confirm these observations and even reported suppression of ROS production by neutrophils in the group of well-trained men after marathon run or after acute bout of moderate intensity running and cycling using the same stimulator of phagocyte oxidative burst [33, 36]. These differences may result from various study protocols, including exercise load and duration, time of blood collection, usage of whole blood or isolated cells for determination of ROS generation after stimulation with various cell activators. For instance, a continuous 90 min exercise at the intensity of 50% VO<sub>2</sub>max caused an increase of phorbol 12-myristate 13-acetate (PMA)-induced neutrophils chemiluminescence while zymosan-induced chemiluminescence remained unchanged in healthy men [37]. PMA is a direct activator of protein kinase C with following activation of NADPH oxidase and neutrophils oxidative burst while stimulation with opsonized zymosan (insoluble cell-wall preparation from the fungi *Saccharomyces cerevisiae*) involves phagocytosis of these particles, cell degranulation and massive production of ROS [38]. In our study, we used fMLP (an analog of N-formylated bacterial chemotactic peptides) that after binding to specific G protein-coupled receptors on the PMNs plasma membrane activates signal transduction pathways (phospholipase C-dependent generation of diacyl glycerol and inositol 1,4,5-triphosphate, rise in the

intracellular  $\text{Ca}^{2+}$  concentration, protein kinase C activation), leading to the formation of the active NADPH oxidase complex and ROS production [38]. Thus, the peak time – time from agonist addition to appearance of maximal chemiluminescence – is about 7-times shorter for fMLP than for opsonized zymosan [31, 39]. This remark may explain the discrepancies between results of our study and some previous investigations [33, 36] about the effect of exercise on ROS production by isolated neutrophils after stimulation with opsonized zymosan. Moreover, we studied the effect of exercise on LBCL, thus neutrophils and monocytes were not subjected to any process of isolation that could change the cell ability to respond to stimulations with various agonists. Elimination of the risk of cell priming or de-priming during the isolation procedure is the important advantage of this method [9-10] which allows monitoring of ROS generation by blood phagocytes under conditions that more closely resemble the in vivo situation than the analysis of isolated cells [10,39].

Exhaustive exercise caused essential increase in circulating pro-inflammatory cytokines, namely IL-6, IL-8, granulocyte colony-stimulating factor (G-CSF), macrophage colony-stimulating factor (M-CSF), and granulocyte macrophage colony stimulating factor (GM-CSF)[41-43]. Although these pro-inflammatory cytokines alone induced rather weak oxidative response of PMNs, they strongly enhanced ROS generation in response to secondary stimulation with fMLP [43, 44, 45, 46], and that could be an explanation of increased rLBCL and fMLP-LBCL in healthy men after exhaustive exercise.

## **Effect of repeated bouts of exhaustive treadmill exercise on the integrity of plasma cell free DNA**

Each bout of exhaustive exercise increased several times the concentration of circulating cf n-DNA, and this was accompanied by the decrease in  $I_{206/78}$  of post-exercise cf n-DNA. This indicates that pool of cf n-DNA released in response to exhaustive exercise is subjected to



factors leading to its enhanced fragmentation. Conversely, no changes in  $I_{218/97}$  were noted over the study period, although cf mt-DNA raised significantly after the 2<sup>nd</sup> and 3<sup>rd</sup> bout. Thus, one may conclude that exercise-induced release of cf mt-DNA was not accompanied by parallel processes resulting in its additional fragmentation.

It is believed that the source of exercise-induced circulating cf n-DNA are NETs [47]. Various factors related to strenuous exercise including heat stress, catecholamines, pro-inflammatory cytokines (e.g. IL-8, IL-6) can induce formation of NETs [47]. Intracellular generation of ROS by NADPH oxidase together with their elaboration by myeloperoxidase in intracellular granules are involved in triggering NETs formation [48]. Thus, nuclear DNA mixed with some components of granules before expulsion of NET fibers from PMNs can be exposed to and damaged by ROS, including breaking of DNA strands into shorter pieces. This could be a plausible explanation of increased post-exercise plasma levels of cf n-DNA with decreased integrity and is in line with observed moderate negative correlations between  $I_{206/78}$  and rLBCL and fMLP-LBCL. Moreover, numerous previous studies showing increased concentration of 8-oxo-7,8-dihydro-2-deoxyguanosine (an oxidized derivative of deoxyguanosine - marker of cellular oxidative stress and oxidative damage to DNA) in leukocytes and urine of athletes after intense exercise [49] support this explanation.

The exercise-induced rise in plasma cf n-DNA is transient [50, 51, 52] probably due to simultaneous increase in the activity of circulating deoxyribonuclease I [53]. Thus, the post-exercise cf n-DNA decreased back to baseline within 0.5 to 2 hours of recovery [54]. The bouts of exhaustive treadmill exercise were separated by 3 days of rest, and all healthy volunteers did not perform any additional strenuous exercise during the whole 13-day study period. Therefore, one may conclude that the contribution of NETs in maintaining the pre-exercise cf n-DNA levels was low (and even negligible) and other processes with the unchanging intensities (e.g. necrosis, apoptosis) were the source of baseline pool of

circulating cf n-DNA. This may explain the relatively stable concentrations of pre-exercise cf n-DNA and its integrity over the study period.

Circulating cf mt-DNA increased in response to exhaustive exercise at the same time as cf n-DNA. However, pre- and post-exercise  $I_{218/97}$  of cf mt-DNA did not differ at any occasion. This is quite surprised considering the release of cf mt-DNA from NETs [8] and formation of NETs from pure mt-DNA in response to skeletal injuries and orthopedic surgery in humans [53]. On the other hand, neutrophils infected with bacteria formed NETs with extracellular fibers containing n-DNA as the main structural component in vitro [8]. It cannot be excluded that neutrophils in response to exhaustive exercise extrude cf n-DNA alone or with very low admixture of cf mt-DNA. Thus, the exercise-induced increase in cf mt-DNA was about 5 to 6-times lower than that of cf n-DNA and no changes of cf mt-DNA integrity were noted.

Acute severe exercise on cycle ergometer until exhaustion increased mitochondrial ROS production in neutrophils of sedentary young males while the same physical exertion had no stimulatory effect on neutrophils mitochondrial ROS after 2 months of regular exercise training program in these subjects [55]. Aerobic strenuous exercise resulted in an increase in superoxide radical activity in contracting muscles. However, the contribution of muscle mitochondria to this increase was small [56, 57], and even mitochondria generated less ROS during exercise than at rest [57].

We studied average trained healthy men who regularly performed recreational training where some of them participated in sport disciplines in the past. Therefore, it seems that exhaustive treadmill run did not induce increased generation of mitochondrial ROS and subsequent oxidative damage to mt-DNA.

Platelets are able to release microparticles containing functional mitochondria as well as free mitochondria [58,59]. Circulating phospholipase A2 can digest mitochondrial membranes with subsequent release of mt-DNA into extracellular space [58]. Exhaustive exercise (e.g.

marathon run) can induce platelets activation and their degranulation [60]. Additionally, short term lifestyle intervention (moderate energy restriction and aerobic training for 6 weeks) increased serum phospholipase A2 activity in overweight or obese subjects [61]. Consequently, it is possible that platelets could be another source of cf mt-DNA and encapsulating membranes can protect mt-DNA from oxidative attack. On the other hand, even mt-DNA released in response to exercise could be damaged by ROS originated from other sources (e.g. NADPH oxidase), its amount seems to be too little to decrease the integrity of total post-exercise pool of circulating cf mt-DNA. These considerations may also explain no differences between pre- and post-exercise integrity of plasma cf mt-DNA.

There are very scant and unconvincing data on the integrity of exercise-induced cf DNA in humans. Incremental treadmill test until volitional exhaustion induced significant increase in circulating cf n-DNA but without changes of its integrity compared to pre-exercise cf-n-DNA in male athletes [62]. On the other hand, 10 km relay race resulted in a significant decrease in the integrity of post-exercise cf n-DNA in a group of recreational runners [63]. Moreover, both these studies did not evaluate circulating concentrations and integrity of pre- and post-exercise cf mt-DNA. Our results solved these discrepancies and showed that repeated exhaustive exercise decreased integrity of circulating cf n-DNA but did not change the integrity of cf mt-DNA.

## **Correlations between integrity of cf n-DNA and luminol enhanced whole blood chemiluminescence**

Because of the low number of studied volunteers, we pooled pre- and post-exercise data from three consecutive bouts of exhaustive treadmill run and calculated correlations between cf n-DNA integrity and rLBCL and fMLP-LBCL. Such approach has some limitations and can increase the risk of bias, however, for instance, we found significant negative correlations

between  $I_{206/78}$  and rLBCL, and  $I_{206/78}$  and fMLP-LBCL for pooled individual pre- and post-exercise data from three bouts. Moreover, all values of Spearman's  $\rho$  ( $n = 6$ ) ranged between -0.40 to -0.29 and that suggests that there is some negative relationship between integrity of cf n-DNA and generation of ROS by circulating phagocytes.

However, according to values of  $\rho$ , these correlations can be interpreted as weak or moderate. This information suggests indirectly that other factors could be responsible for decreased integrity of post-exercise cf n-DNA, or post-exercise LBCL did not reflect precisely the generation of ROS by PMNs during the exhaustive run when NETs were formed and cf n-DNA released. Circulating cf n-DNA increased already after 9 min from the onset of incremental treadmill run test (at the end of 10 km/h stage corresponding to 63%  $VO_2$  max) [63]. In our study, mean run time was 47 min, 57 min and 56 min at the 1<sup>st</sup>, 2<sup>nd</sup> and 3<sup>rd</sup> bout [3], respectively. Thus, pre- and post-exercise LBCL (rLBCL and fMLP-LBCL) reflected the activity of PMNs just before and after the exercise but not during the last 30 min of run accompanied by the formation of NETs. Moreover, luminol crosses the cellular membrane of phagocytes (PMNs and monocytes); in this way, LBCL can mirror the extra- and intracellular production of ROS [64]. It is possible that numerous plasma antioxidants can inactivate extracellular ROS (in the close vicinity of PMNs) before their reaction with n-DNA. In consequence, intracellular activity of ROS during formation of NETs seems to be crucial for the decrease of cf n-DNA integrity. These aforementioned reasons may explain the low strength of observed correlations between pooled data of cf n-DNA integrity and LBCL.

Concomitant increase in the serum activity of DNase I was recognized as a factor responsible for transient nature of cf n-DNA response to strenuous exercise [65]. Therefore, decreased integrity of post-exercise cf n-DNA could be the result of cleaving NETs DNA by this endonuclease. However, we did not observe any changes of post-exercise cf mt-DNA

integrity. For that reason, contribution of DNase I to the decreased integrity of post-exercise cf n-DNA seems to be not important under conditions of our study.

## **Strengths and weaknesses of the study**

Strengths of this study were: (A) the unique protocol consisting of three exhaustive treadmill runs at speed corresponding to 70% of individual  $VO_2$ max separated by 3 days of resting and executed in a standardized laboratory environment; (B) simultaneous measurement of pre- and post-exercise concentrations and integrity of circulating cf n-DNA and cf mt-DNA, accompanied by monitoring of resting and fMLP- stimulated LBCL as a marker of ROS production by circulating phagocytes; (C) recruitment of male volunteers (members of our university scientific or administrative staff) highly motivated to comply with instructions related to participation in the study and; (D) exclusion of any subjects (on the basis of medical examination, blood chemistry, spirometry) who could have altered cf DNA levels for reasons other than strenuous exercise. On the other hand, relatively low number of studied subjects (n=11) and exclusion of female volunteers from the trial could be recognized as a weakness of the study. Because this report is the extension of our previous one, all these afore-mentioned limitations were discussed in details elsewhere [3]. In addition, the inhibitory effect of progesterone and estradiol on ROS production by human PMNs in vitro [66] supported our decision on participation of only male volunteers in the study. Moreover, the low number of studied subjects was counterbalanced by three repeated bouts of exercise. We found that all bouts induced the significant increase in cf n-DNA, rLBCL and fMLP-LBCL, while two bouts were accompanied by the decrease in cf n-DNA integrity and increase in circulating cf mt-DNA without changes of its integrity. These considerations indicate the repeatability of these phenomena despite small studied group of volunteers. However, there are no doubts that further studies involving larger groups of male and female volunteers should be performed

especially in the light of analysis of correlation and determination of causality between decreased of post-exercise cf n-DNA integrity and enhanced LBCL

## Conclusions

We found that repeated bouts of exhaustive exercise separated by three days of resting caused an increase in luminol enhanced whole blood chemiluminescence and in concentrations of circulating cf n-DNA. Post exercise cf n-DNA revealed decreased integrity which negatively correlated with LBCL. Because whole blood chemiluminescence reflects ROS production by circulating phagocytes, one may conclude that oxidants may be involved in the release of cf n-DNA and cf n-DNA strand breaks in response to exhaustive exercise. Although exercise caused moderate increase in plasma levels of cf mt-DNA, its integrity was stable and did not associate with blood chemiluminescence. This suggests a minor role of ROS in exercise-induced changes of cf mt-DNA.

## Author Contributions

Conceptualization: RS DN KW.  
Data curation: RS PM.  
Formal analysis: RS.  
Funding acquisition: DN.  
Investigation: RS EP AS AW PK TB KW.  
Methodology: RS DN KW.  
Project administration: DN.  
Resources: DN GP.  
Software: RS.  
Supervision: DN.

Validation: RS DN.

Visualization: RS.

Writing – original draft: RS DN.

Writing – review & editing: DN RS GP.

## Reference

1. Brown WM, Davison GW, McClean CM, Murphy MH. A Systematic Review of the Acute Effects of Exercise on Immune and Inflammatory Indices in Untrained Adults. *Sports Med Open*. 2015;1(1):35. DOI:10.1186/s40798-015-0032-x
2. Saito D, Nakaji S, Umeda T, Kurakake S, Danjo K, Shimoyama T, et. al. Effects of long-distance running on serum opsonic activity measured by chemiluminescence. *Luminescence* 2003; 17: 122–124. DOI:10.1002/bio.438
3. Stawski R, Walczak K, Kosielski P, Meissner P, Budlewski T, Padula G, Nowak D. Repeated bouts of exhaustive exercise increase circulating cell free nuclear and mitochondrial DNA without development of tolerance in healthy men. *PLoS One*. 2017 May 24;12(5):e0178216 DOI: 10.1371/journal.pone.0178216.
4. Tug S, Helmig S, Deichmann ER, Schmeier-Jürchott A, Wagner E, Zimmermann T, et al. Exercise-induced increases in cell free DNA in human plasma originate predominantly from cells of the haematopoietic lineage. *Exerc Immunol Rev*. 2015;21:164–73. PMID:25826002
5. Lui YYN, Chik K-W, Chiu RWK, Ho C-Y, Lam CWK, Lo YM. Predominant hematopoietic origin of cell-free DNA in plasma and serum after sex-mismatched bone marrow transplantation. *Clin. Chem*. 2002;48: 421–7. PMID:11861434

- 538 6. Syu GD, Chen HI, Jen CJ. Acute severe exercise facilitates NET formation in sedentary but  
539 not active subjects. *Med Sci Sports Exerc* 45: 238–244, 2013.  
540 DOI:10.1249/MSS.0b013e31826df4a1
- 541 7. Babior BM. (1999). NADPH oxidase: an update. *Blood* 93 1464–1476. PMID:10029572
- 542 8. Fuchs TA, Abed U, Goosmann C, Hurwitz R, Schulze I, Wahn V, et al. (2007). Novel cell  
543 death program leads to neutrophil extracellular traps. *J. Cell Biol.* 176 231–241.  
544 DOI:10.1083/jcb.200606027
- 545 9. Kukovetz EM, Bratschitsch G, Hofer HP, Egger G, Schaur RJ. Influence of age on the  
546 release of reactive oxygen species by phagocytes as measured by a whole blood  
547 chemiluminescence assay. *Free Radic Biol Med.* 1997;22:433–438. PMID:8981034
- 548 10. Kopprasch S, Graessler J, Kohl M, Bergmann S, Schreoder HE. Comparison of circulating  
549 phagocyte oxidative activity measured by chemiluminescence in whole blood and isolated  
550 polymorphonuclear leukocytes. *Clin Chim Acta.* 1996;253:145–157. PMID:8879845
- 551 11. Luczynska M, Szkudlarek U, Dziankowska-Bartkowiak B, Waszczykowska E, Kasielski  
552 M, Jozefowicz-Okonkwo G, et al. Elevated whole blood chemiluminescence in patients with  
553 systemic sclerosis. *Clin Exp Rheumatol.* 2005 Mar-Apr;23(2):173-9. PMID:15895886
- 554 12. Rysz J, Potargowicz E, Banach M, Luczyńska M, Stolarek R, Białasiewicz P et al.  
555 Increased whole blood chemiluminescence in patients with chronic renal failure independent  
556 of hemodialysis treatment. *Arch Immunol Ther Exp (Warsz).* 2006 Sep-Oct;54(5):347-55.  
557 DOI:10.1007/s00005-006-0040-0
- 558 13. Mochida N, Umeda T, Yamamoto Y, Tanabe M, Kojima A, Sugawara K, et al. The main  
559 neutrophil and neutrophil-related functions may compensate for each other following  
560 exercise-a finding from training in university judoists. *Luminescence.* 2007 Jan-Feb;22(1):20-  
561 8. DOI:10.1002/bio.922



14. Peake J, Wilson G, Hordern M, Suzuki K, Yamaya K, Nosaka K, et al. Coombes JS. Changes in neutrophil surface receptor expression, degranulation, and respiratory burst activity after moderate- and high-intensity exercise. *J Appl Physiol* (1985). 2004 Aug;97(2):612-8. DOI:10.1152/japplphysiol.01331.2003
15. Ostrowski S, Kasielski M, Kordiak J, Nowak D. Elevated resting and agonist-induced whole blood chemiluminescence in patients with active infective endocarditis. *Interact Cardiovasc Thorac Surg*. 2009;8:12–16. DOI:10.1510/icvts.2008.183285
16. Umetani N, Giuliano AE, Hiramatsu SH, Amersi F, Nakagawa T, Martino S, et al. Prediction of breast tumor progression by integrity of free circulating DNA in serum. *J Clin Oncol*. 2006 Sep 10;24(26):4270-6. DOI:10.1200/JCO.2006.05.9493
17. Phaneuf S, Leeuwenburgh C. Apoptosis and exercise. *Med Sci Sports Exerc*. 2001 Mar;33(3):393-6. *Clin Chem*. 2011 Apr;57(4):633-6. DOI: 10.1373/clinchem.2010.158030.
18. Beiter T, Fragasso A, Hudemann J, Niess AM, Simon P. Short-term treadmill running as a model for studying cell-free DNA kinetics in vivo. *Clin Chem*. 2011 Apr;57(4):633-6. DOI: 10.1373/clinchem.2010.158030
19. Tepper CG, Studzinski GP. Resistance of mitochondrial DNA to degradation characterizes the apoptotic but not the necrotic mode of human leukemia cell death. *J Cell Biochem*. 1993 Jul;52(3):352-61. DOI:10.1002/jcb.240520311
20. Alexeyev MF. Is there more to aging than mitochondrial DNA and reactive oxygen species? *FEBS J*. 2009 Oct;276(20):5768-87. DOI: 10.1111/j.1742-4658.2009.07269.x
21. Kohler C, Radpour R, Barekati Z, Asadollahi R, Bitzer J, Wight E, et al. Levels of plasma circulating cell free nuclear and mitochondrial DNA as potential biomarkers for breast tumors. *Mol Cancer*. 2009 Nov 17;8:105. DOI: 10.1186/1476-4598-8-105.
22. Kreher JB. Diagnosis and prevention of overtraining syndrome: an opinion on education strategies. *Open Access J Sports Med*. 2016 Sep 8;7:115-22. DOI:10.2147/OAJSM.S91657

23. Schwellnus M, Soligard T, Alonso JM, Bahr R, Clarsen B, Dijkstra HP, et al. How much is too much? International Olympic Committee consensus statement on load in sport and risk of illness. *Br J Sports Med.* 2016 Sep;50(17):1043-52. DOI: 10.1136/bjsports-2016-096572.
24. Meeusen R, Nederhof E, Buyse L, Roelands B, de Schutter G, Piacentini MF. Diagnosing overtraining in athletes using the two-bout exercise protocol. *Br J Sports Med.* 2010 Jul;44(9):642-8. DOI:10.1136/bjism.2008.049981
25. Atamaniuk J, Vidotto C, Kinzlbauer M, Bachl N, Tiran B, Tschann H. Cell-free plasma DNA and purine nucleotide degradation markers following weightlifting exercise. *Eur J Appl Physiol.* 2010;110(4):695–701. DOI:10.1007/s00421-010-1532-5
26. Fatouros IG, Jamurtas AZ, Nikolaidis MG, Destouni A, Michailidis Y, Vrettou C, et al. Time of sampling is crucial for measurement of cell-free plasma DNA following acute aseptic inflammation induced by exercise. *Clin Biochem.* 2010 Nov; 43(16-17):1368-70. DOI:10.1016/j.clinbiochem.2010.08.020
27. Andrew Rhodes, Maurizio Cecconi. Cell-free DNA and outcome in sepsis. *Crit Care.* 2012; 16(6): 170. DOI: 10.1186/cc11508
28. Göögenur M, Burchard J, Gogenur I. The role of total cell-free DNA in predicting outcomes among trauma patients in the intensive care unit: a systematic review *Crit Care.* 2017; 21: 14. DOI: 10.1186/s13054-016-1578-9
29. Breitbach S, Tug S, Simon P. Circulating cell-free DNA: an up-coming molecular marker in exercise physiology. *Sports Med.* 2012;42(7):565–86. DOI:10.2165/11631380-000000000-00000
30. Fatouros IG, Destouni A, Margonis K, Jamurtas AZ, Vrettou C, Kouretas D et al. Cell-free plasma DNA as a novel marker of aseptic inflammation severity related to exercise overtraining. *Clin Chem.* 2006 Sep;52(9):1820-4. DOI:10.1373/clinchem.2006.070417

31. Suzuki K, Naganuma S, Totsuka M, Suzuki KJ, Mochizuki M, Shiraishi M, et al.. Effects of exhaustive endurance exercise and its one-week daily repetition on neutrophil count and functional status in untrained men. *Int J Sports Med.* 1996 Apr;17(3):205-12. DOI:10.1055/s-2007-972833
32. Smith JA, Telford RD, Mason IB, Weidemann MJ. Exercise, training and neutrophil microbicidal activity. *Int J Sports Med.* 1990 Jun;11(3):179-87. DOI:10.1055/s-2007-1024788
33. Chinda D, Nakaji S, Umeda T, Shimoyama T, Kurakake S, Okamura N, et al. A competitive marathon race decreases neutrophil functions in athletes. *Luminescence.* 2003 Nov-Dec;18(6):324-9. DOI:10.1002/bio.744
34. Yamada M, Suzuki K, Kudo S, Totsuka M, Shimoyama T, Nakaji S, et al. Effect of exhaustive exercise on human neutrophils in athletes. *Luminescence.* 2000 Jan-Feb;15(1):15-20. DOI:10.1002/(SICI)1522-7243(200001/02)15:1<15::AID-BIO570>3.0.CO;2-O
35. Sato H, Abe T, Kikuchi T, Endo T, Hasegawa H, Suzuki K, et al.. Changes in the production of reactive oxygen species from neutrophils following a 100-km marathon. *Nihon Eiseigaku Zasshi.* 1996 Jul;51(2):612-6. PMID:8783878
36. Pyne DB, Baker MS, Smith JA, Telford RD, Weidemann MJ. Exercise and the neutrophil oxidative burst: biological and experimental variability. *Eur J Appl Physiol Occup Physiol.* 1996;74(6):564-71. PMID:8971500
37. Sato H, Suzuki K, Nakaji S, Sugawara K, Totsuka M, Sato K. Effects of acute endurance exercise and 8 week training on the production of reactive oxygen species from neutrophils in untrained men. *Nihon Eiseigaku Zasshi.* 1998 Jul;53(2):431-40. PMID:9757760
38. Makni-Maalej K, Chiandotto M, Hurtado-Nedelec M, Bedouhene S, Gougerot-Pocidalo MA, et al. Zymosan induces NADPH oxidase activation in human neutrophils by inducing the phosphorylation of p47phox and the activation of Rac2: involvement of protein tyrosine

kinases, PI3Kinase, PKC, ERK1/2 and p38MAPkinase. *Biochem Pharmacol.* 2013 Jan  
1;85(1):92-100. DOI: 10.1016/j.bcp.2012.10.010.

39. Szkudlarek U, Luczynska M, Kasielski M, Kaucka S, Nowak D: Exhaled hydrogen  
peroxide correlates with the release of reactive oxygen species by blood phagocytes in healthy  
subjects. *Respir Med* 97:718-725, 2003. PMID:12814160

40. Suzuki K, Nakaji S, Yamada M, Liu Q, Kurakake S, Okamura N, et al.. Impact of a  
competitive marathon race on systemic cytokine and neutrophil responses. *Med Sci Sports  
Exerc.* 2003 Feb;35(2):348-55. DOI:10.1249/01.MSS.0000048861.57899.04

41. Nielsen HG, Oktedalen O, Opstad PK, Lyberg T. Plasma Cytokine Profiles in Long-Term  
Strenuous Exercise. *J Sports Med (Hindawi Publ Corp).* 2016;2016:7186137. DOI:  
10.1155/2016/7186137.

42. Suzuki K, Nakaji S, Yamada M, Totsuka M, Sato K, Sugawara K. Systemic inflammatory  
response to exhaustive exercise. *Cytokine kinetics. Exerc Immunol Rev.* 2002;8:6-48.  
PMID:12690937

43. Borish L, Rosenbaum R, Albury L, Clark S. Activation of neutrophils by recombinant  
interleukin 6. *Cell Immunol.* 1989 Jul;121(2):280-9. PMID:2544300

44. Elbim C, Bailly S, Chollet-Martin S, Hakim J, Gougerot-Pocidalo MA. Differential  
priming effects of proinflammatory cytokines on human neutrophil oxidative burst in  
response to bacterial N-formyl peptide. *Infect Immun.* 1994 Jun;62(6):2195-201.  
PMCID:PMC186497

45. El-Benna J, Dang PMC, Gougerot-Pocidalo MA. Priming of the neutrophil NADPH  
oxidase activation: role of p47phox phosphorylation and NOX2 mobilization to the plasma  
membrane. *Semin Immunopathol* 2008;30:279–89. DOI:10.1007/s00281-008-0118-3

- 658 46. Khwaja A, Carver JE, Linch DC. Interactions of granulocyte-macrophage colony-  
659 stimulating factor (CSF), granulocyte CSF, and tumor necrosis factor alpha in the priming of  
660 the neutrophil respiratory burst. *Blood*. 1992 Feb 1;79(3):745-53. PMID:1370644
- 661 47. Beiter T, Fragasso A, Hartl D, Nieß AM. Neutrophil extracellular traps: a walk on the  
662 wild side of exercise immunology. *Sports Med*. 2015 May;45(5):625-40. DOI:  
663 10.1007/s40279-014-0296-1.
- 664 48. Bjornsdottir H, Welin A, Michaelsson E, Osla V, Berg S, Christenson K, et al. Neutrophil  
665 NET formation is regulated from the inside by myeloperoxidase-processed reactive oxygen  
666 species. *Free Radic Biol Med*. 2015 Dec;89:1024-35. DOI:  
667 10.1016/j.freeradbiomed.2015.10.398.
- 668 49. Neubauer O, Reichhold S, Nersesyan A, König D, Wagner KH.. Exercise-induced DNA  
669 damage: is there a relationship with inflammatory responses? *Exerc Immunol Rev*.  
670 2008;14:51–72. PMID:19203084
- 671 50. Atamaniuk J, Vidotto C, Tschan H, Bachl N, Stuhlmeier KM, Muller MM. Increased  
672 concentrations of cell-free plasma DNA after exhaustive exercise. *Clin Chem*. 2004;  
673 50(9):1668±70.DOI: 10.1373/clinchem.2004.034553 PMID: 15331502
- 674 51. Atamaniuk J, Stuhlmeier KM, Vidotto C, Tschan H, Dossenbach-Glaninger A, et al..  
675 Effects of ultra-marathon on circulating DNA and mRNA expression of pro- and anti-  
676 apoptotic genes in mononuclear cells. *Eur J Appl Physiol*. 2008; 104(4):711±7. DOI:  
677 10.1007/s00421-008-0827-2
- 678 52. Velders M, Treff G, Machus K, BosnyaÂk E, Steinacker J, Schumann U. Exercise is a  
679 potent stimulus for enhancing circulating DNase activity. *Clin Biochem*. 2014; 47(6):471±4.  
680 DOI: 10.1016/j.clinbiochem.2013.12.017

681 53. McIlroy DJ, Jarnicki AG, Au GG, Lott N, Smith DW, Hansbro PM, et al.. Mitochondrial  
682 DNA neutrophil extracellular traps are formed after trauma and subsequent surgery. J Crit  
683 Care. 2014 Dec;29(6):1133.e1-5. DOI: 10.1016/j.jcrc.2014.07.013.

684 54. Yousefi S, Mihalache C, Kozlowski E, Schmid I, Simon HU. Viable neutrophils release  
685 mitochondrial DNA to form neutrophil extracellular traps. Cell Death Differ  
686 2009;16(11):1438–44. DOI:10.1038/cdd.2009.96

687 55. Syu GD, Chen HI, Jen CJ. Severe exercise and exercise training exert opposite effects on  
688 human neutrophil apoptosis via altering the redox status. PLoS One. 2011;6(9):e24385. DOI:  
689 10.1371/journal.pone.0024385.

690 56. Sakellariou GK, Vasilaki A, Palomero J, Kayani A, Zibrik L, McArdle A, et al.. Studies of  
691 mitochondrial and nonmitochondrial sources implicate nicotinamide adenine dinucleotide  
692 phosphate oxidase(s) in the increased skeletal muscle superoxide generation that occurs  
693 during contractile activity. Antioxid Redox Signal. 2013 Feb 20;18(6):603-21. DOI:  
694 10.1089/ars.2012.4623.

695 57. Zuo L, Zhou T, Pannell BK, Ziegler AC, Best TM. Biological and physiological role of  
696 reactive oxygen species--the good, the bad and the ugly. Acta Physiol (Oxf). 2015  
697 Jul;214(3):329-48. DOI: 10.1111/apha.12515.

698 58. Boudreau LH, Duchez AC, Cloutier N, Soulet D, Martin N, Bollinger J, et al.. Platelets  
699 release mitochondria serving as substrate for bactericidal group IIA-secreted phospholipase  
700 A2 to promote inflammation. Blood. 2014 Oct 2;124(14):2173-83. DOI: 10.1182/blood-2014-  
701 05-573543.

702 59. Marcoux G, Duchez AC, Rousseau M, Levesque T, Boudreau LH, Thibault L, et al.  
703 Microparticle and mitochondrial release during extended storage of different types of platelet  
704 concentrates. Platelets. 2017;28(3):272–80. DOI:10.1080/09537104.2016.1218455

60. Kratz A, Wood MJ, Siegel AJ, Hiers JR, Van Cott EM. Effects of marathon running on platelet activation markers: direct evidence for in vivo platelet activation. *Am J Clin Pathol.* 2006; 125(2):296±300 DOI.org/10.1309/PRF5-N7P2-XM6E-243H
61. Rector RS, Turk JR, Sun GY, Guilford BL, Toedebusch BW, McClanahan MW, et al. Short-term lifestyle modification alters circulating biomarkers of endothelial health in sedentary, overweight adults. *Appl Physiol Nutr Metab.* 2006 Oct;31(5):512-7. DOI:10.1139/h06-04
62. Breitbach S, Tug S, Helmig S, Zahn D, Kubiak T, Michal M, et al. Direct quantification of cell-free, circulating DNA from unpurified plasma. *PLoS One.* 2014 Mar 3;9(3):e87838. DOI: 10.1371/journal.pone.0087838.
63. Breitbach S, Sterzing B, Magallanes C, Tug S, Simon P Direct measurement of cell-free DNA from serially collected capillary plasma during incremental exercise. *J Appl Physiol* (1985). 2014 Jul 15;117(2):119-30. DOI: 10.1152/japplphysiol.00002.2014.
64. Rajecky M, Lojek A, Ciz M: Differentiating between intra- and extracellular chemiluminescence in diluted whole-blood samples. *Int J Lab Hematol* 34:136–142, 2012. DOI:10.1111/j.1751-553X.2011.01370.x
65. Beiter T, Fragasso A, Hudemann J, Schild M, Steinacker J, Mooren FC, et al. Neutrophils release extracellular DNA traps in response to exercise. *J Appl Physiol* (1985). 2014 Aug 1;117(3):325-33. DOI:10.1152/japplphysiol.00173.2014.
66. Buyon JP, Korchak HM, Rutherford LE, Ganguly M, Weissmann G. Female hormones reduce neutrophil responsiveness in vitro. *Arthritis Rheum.* 1984 Jun;27(6):623-30. PMID:6329234
